# Supplementary material for: An organ boundary-enriched gene regulatory network uncovers regulatory hierarchies underlying axillary meristem initiation
Source: PubMed Central journal article supplement (PMC4299377; doi:10.15252/msb.20145470), 2014-10-30
Supplement: msb0010-0755-sd1.pdf [file msb0010-0755-sd1.pdf]

**Figure S1.** (A) Expression of *pLAS>>GFP-ER* (green), and (B) pattern of *AS1* promoter driven GUS expression in longitudinal sections through vegetative shoot apex of 25-day-old wild-type like plants showing cell type specific expression promoter activities. Bars = 50  $\mu$ m

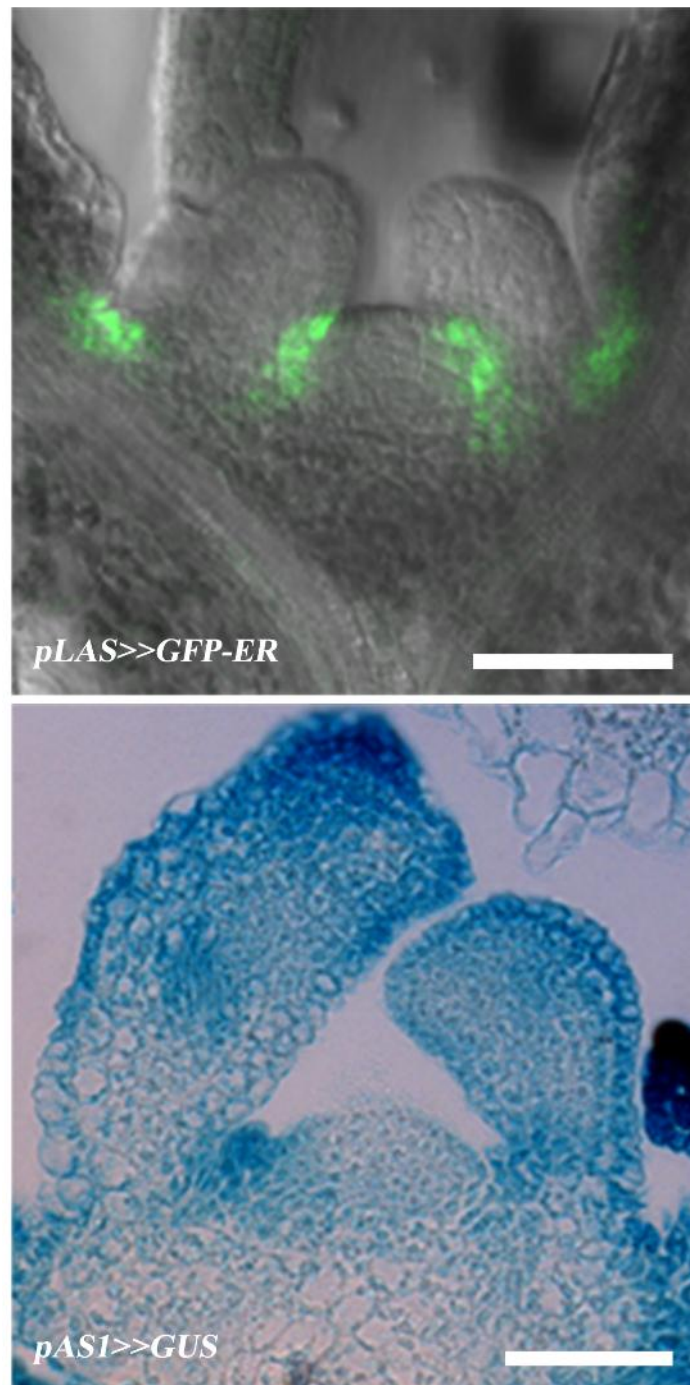

**Figure S2.** GO analysis identified significantly overrepresented (FDR adjusted  $P < 0.01$ ) gene categories for the leaf cell-specific transcripts. Color bar: significance levels for categories by hypergeometric test with FDR correction.

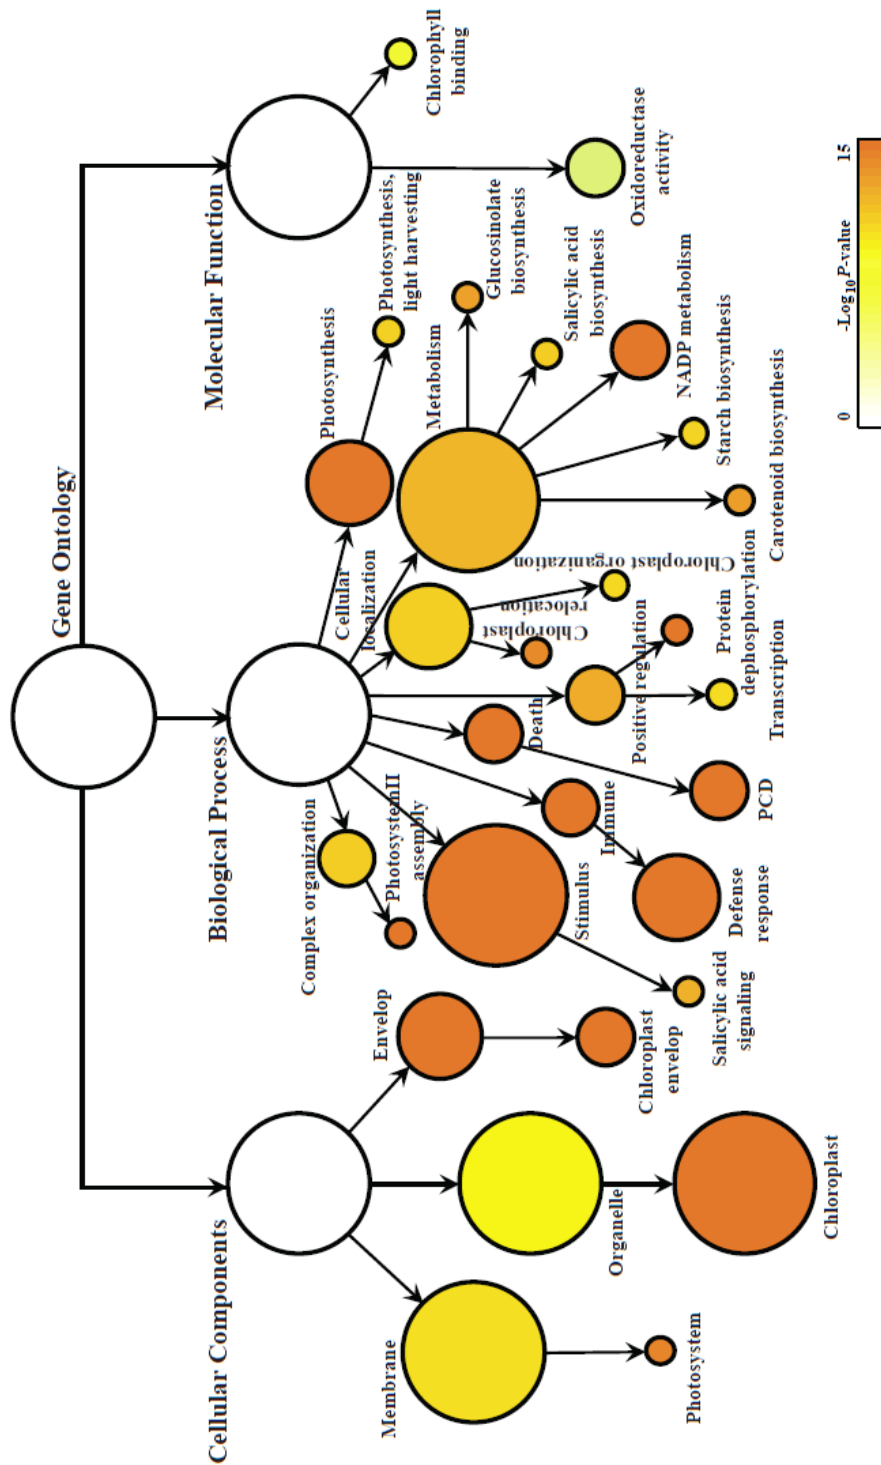

**Figure S3.** Reporter assay procedure and readout with a promoter fragment and 96 TF pools w/ and w/o AbA selection. Each TF pool used in the first round included four TFs, and each TF in positive pools was individually tested in the second-round screen.

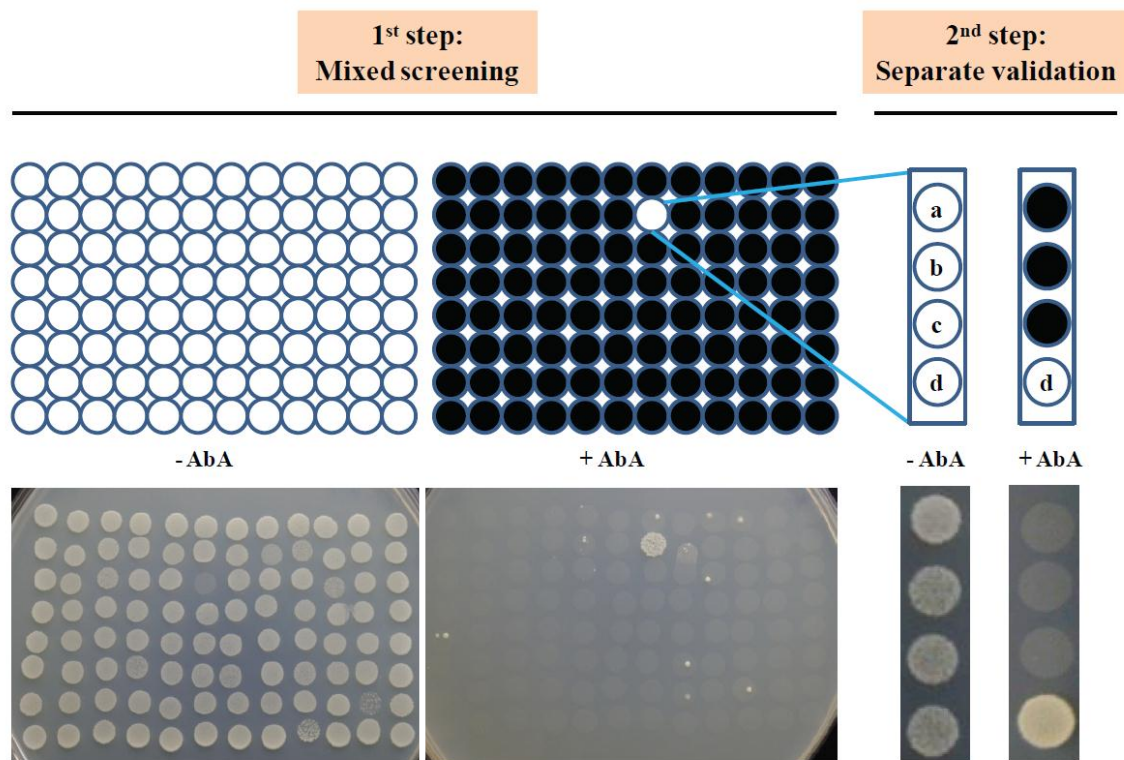

**Figure S4.** Weighted least square regression (WLSR) plots. WLSR was used to predict the potential of regulatory relationships between a target gene and its upstream TF. We used WLSR to fit a line that incorporates variance measurements across three technical replicates for each of the two biological replicates (six replicates in total). The slope of a line predicts the degree of activation or repression with a *P* value represents the confidence level for the regulation. See *Materials and Methods* for more details.

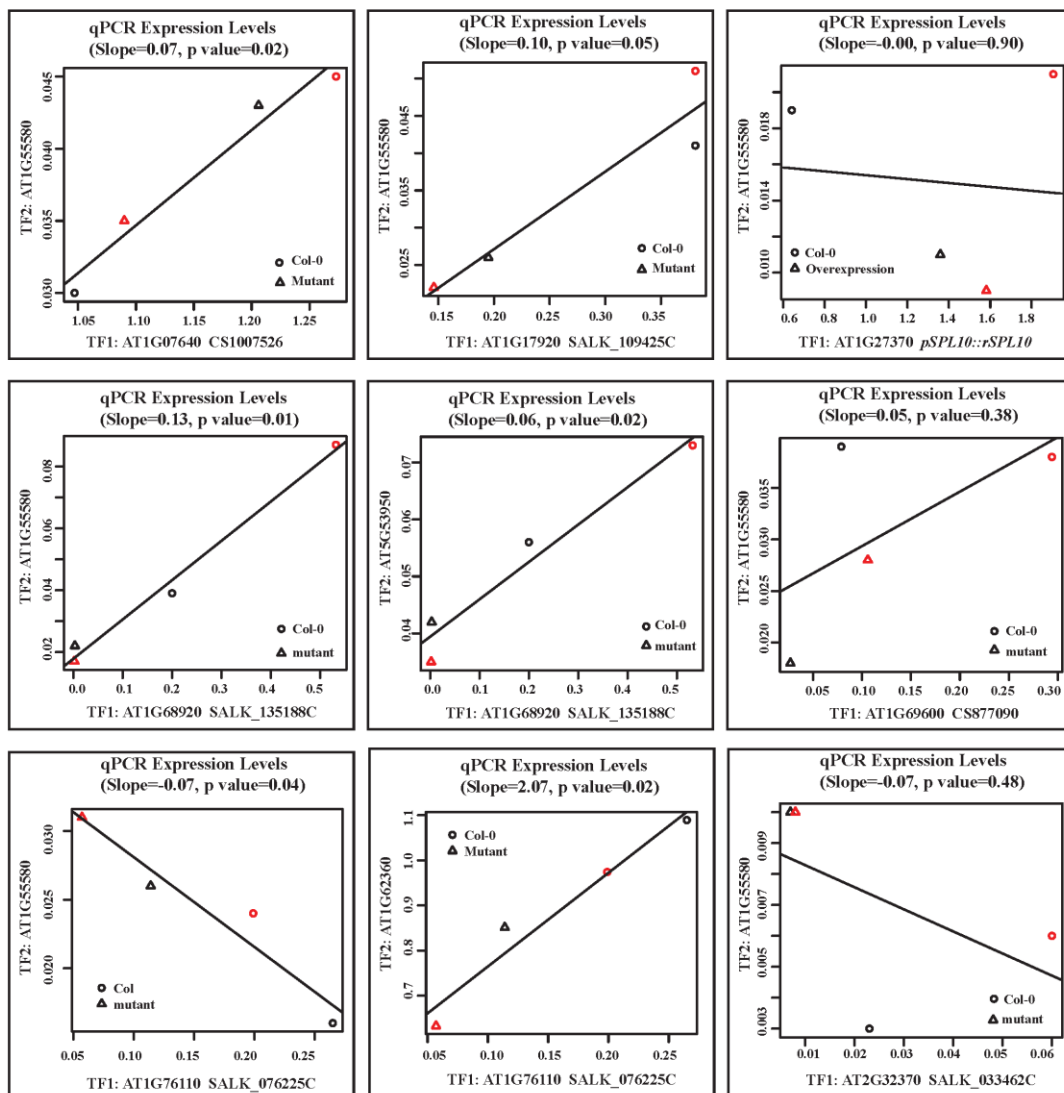

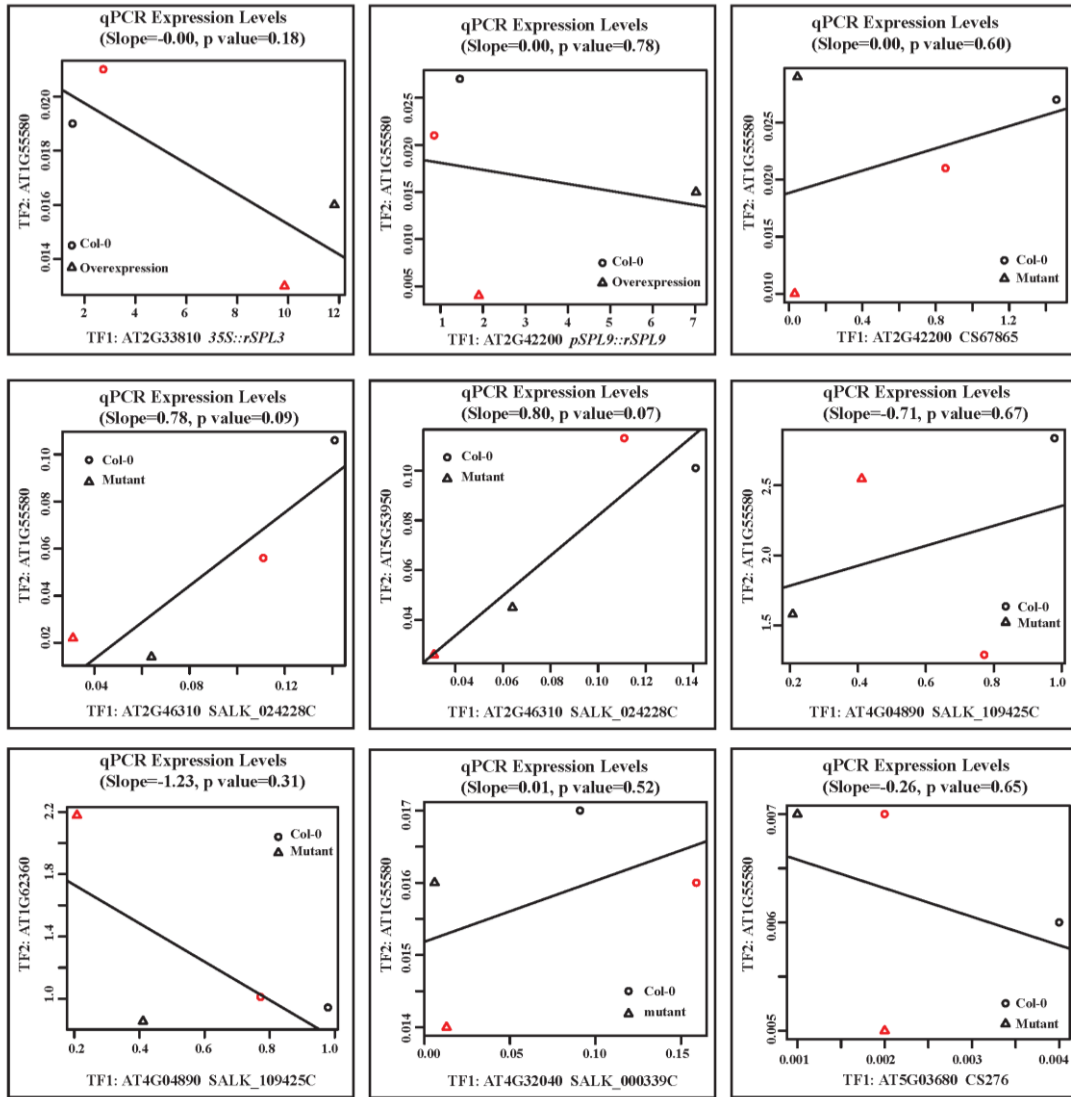

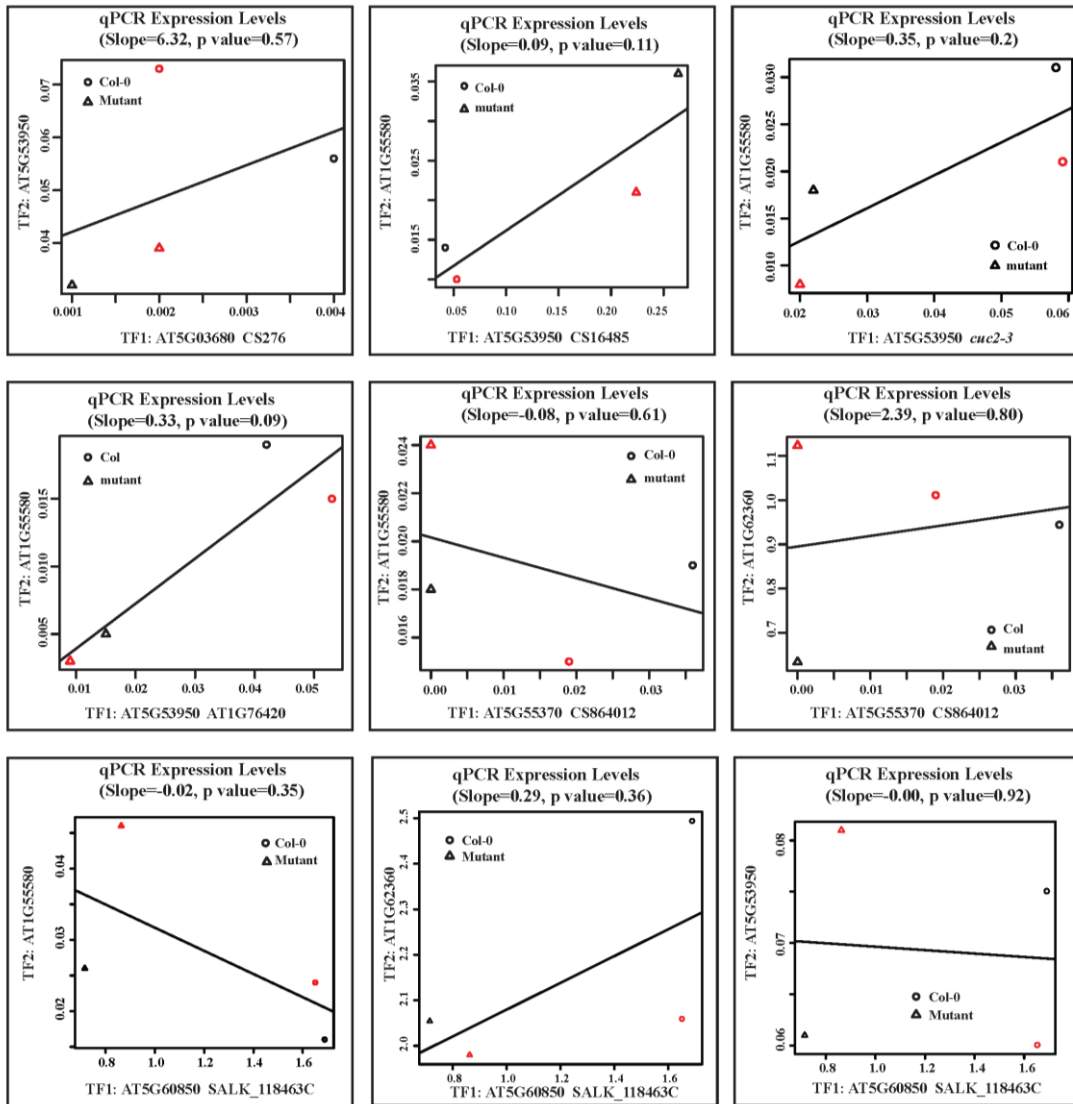

**Figure S5.** Interactions between TFs and their targets indicated by WLSR analysis. Regulatory interaction strength is shown by arrow and edge width. The opacity represents the interaction *P* value, in which darker arrow or edge opacity indicates a more-significant interaction.

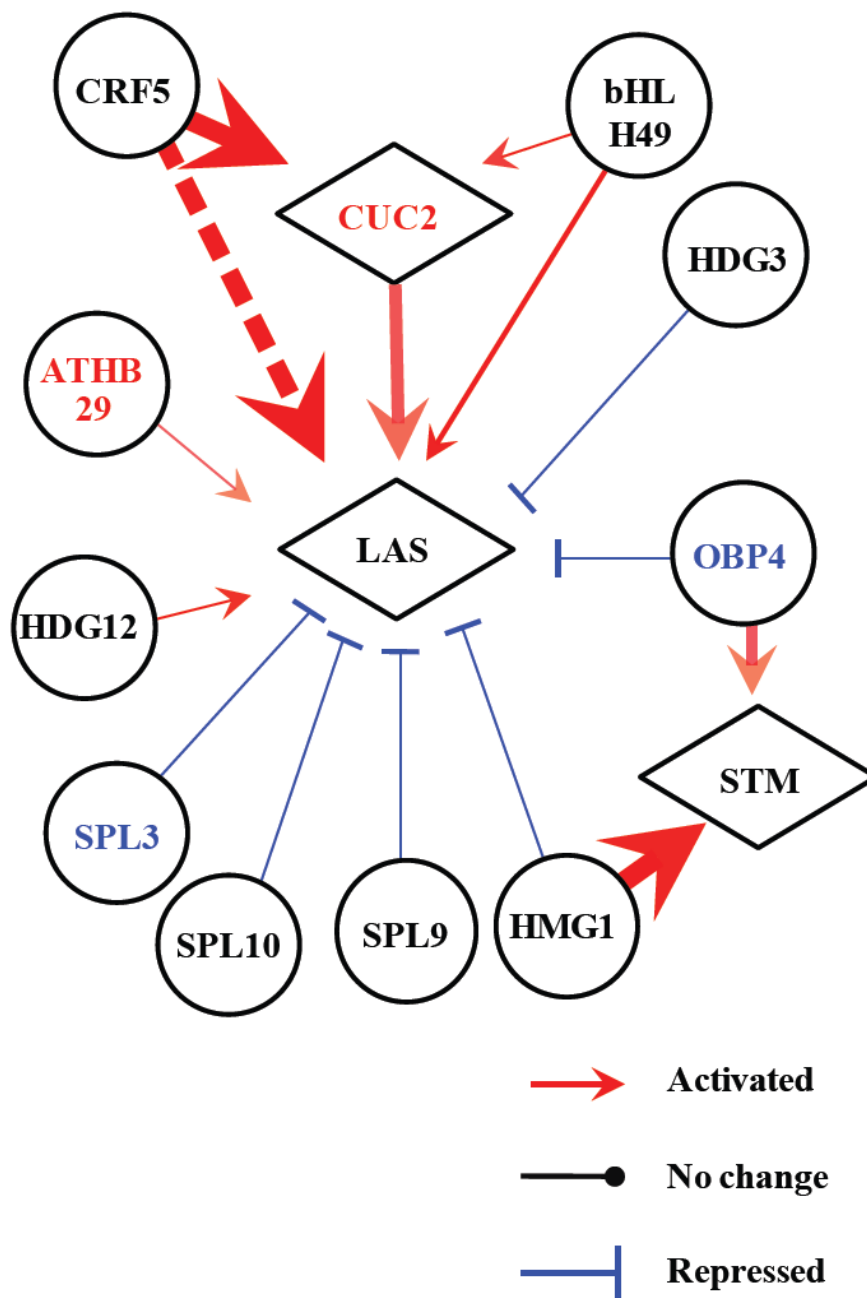

**Figure S6.** Phenotypic characterization of new mutants affecting leaf margin development and cotyledon formation. **(A)** Leaf series of Col-0, *cuc2-1D*, *ptl-1* and *hmg1*. Leaves with enhanced margin serration are highlighted by arrows. **(B)** Cotyledon morphology of Col-0 and *hdg12*. Tricots and fused cotyledons in the *hdg12* mutant are shown. **(C)** Disordered leaf phyllotaxy and fusion phenotypes of *hdg12*. **(D)** Phenotype statistics of *hdg12*.



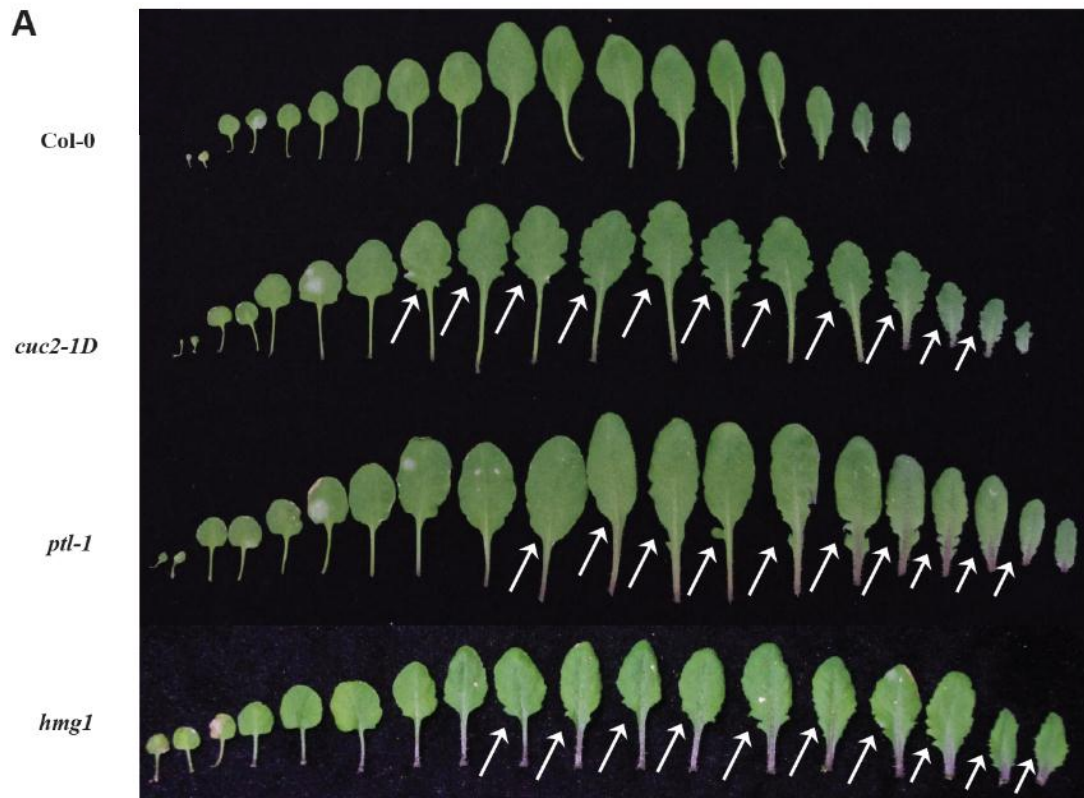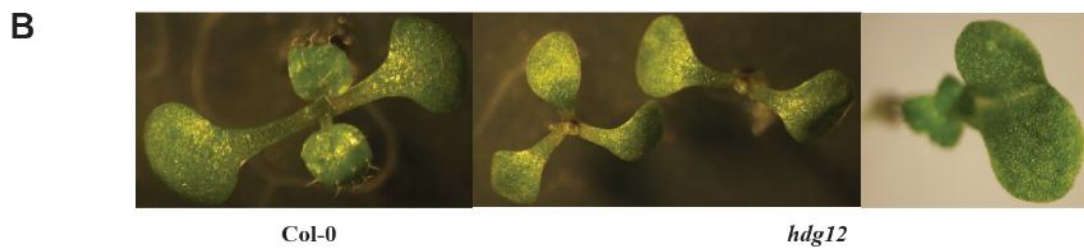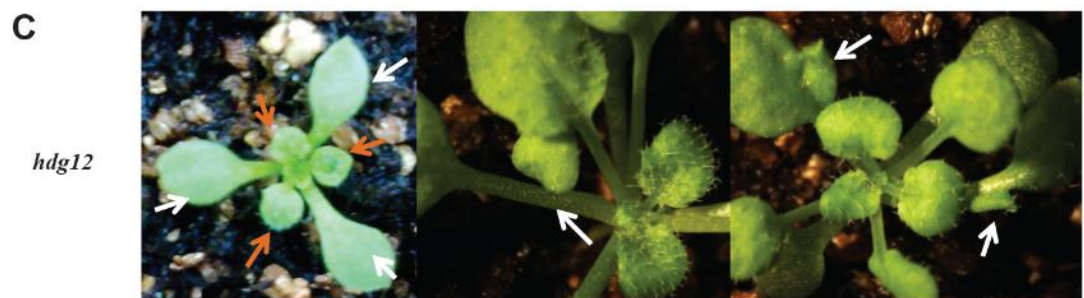

**D**

|              | Three cotyledons | Fused cotyledons | Delayed development |
|--------------|------------------|------------------|---------------------|
| Col-0        | 0/120 (0%)       | 0/120 (0%)       | 0/120 (0%)          |
| <i>hdg12</i> | 13/248(5.2%)     | 13/248 (2.20%)   | 248/248 (100%)      |
